# Supplementary material for: Achieving 15.81% and 15.29% efficiency of all-polymer solar cells based on layer-by-layer and bulk heterojunction structures
Source: Royal Society of Chemistry journal article supplement (doi:10.1039/d2ta02914f), 2022-01-01
Supplement: d2ta02914f1.pdf [file d2ta02914f1.pdf]

Supporting Information

**Achieving 15.81% and 15.29% efficiency of all-polymer solar cells based on layer-by-layer  
or bulk heterojunction structure**

Wenjing Xu,<sup>a</sup> Xixiang Zhu,<sup>a</sup> Xiaoling Ma,<sup>a\*</sup> Hang Zhou,<sup>b</sup> Xiong Li,<sup>c</sup> Sang Young Jeong,<sup>d</sup> Han Young Woo,<sup>d</sup> Zhengji Zhou,<sup>e\*</sup> Qianqian Sun,<sup>b\*</sup> Fujun Zhang<sup>a\*</sup>

<sup>a</sup> Key Laboratory of Luminescence and Optical Information, Ministry of Education, Beijing Jiaotong University, 100044, Beijing, China.

<sup>b</sup> Collaborative Innovation Center of Light Manipulations and Applications in Universities of Shandong, School of Physics and Electronics, Shandong Normal University, Jinan 250014, People's Republic of China.

<sup>c</sup> Department of Physics, Beijing Technology and Business University, 100048, Beijing, China.

<sup>d</sup> Organic Optoelectronic Materials Laboratory, Department of Chemistry, College of Science, Korea University, 02841, Seoul, Republic of Korea.

<sup>e</sup> Key Lab for Special Functional Materials, Ministry of Education, National and Local Joint Engineering Research Center for High-Efficiency Display and Lighting Technology, and School of Materials, Henan University, 475004, Kaifeng, Henan Province, China.

Corresponding author: [maxl@bjtu.edu.cn](mailto:maxl@bjtu.edu.cn) (Xiaoling), [zzj@henu.edu.cn](mailto:zzj@henu.edu.cn) (Zhengji),

[qianqiansun@sdu.edu.cn](mailto:qianqiansun@sdu.edu.cn) (Qianqian), [fjzhang@bjtu.edu.cn](mailto:fjzhang@bjtu.edu.cn) (Fujun)

**Experimental section**

**Device Fabrication:** The patterned indium tin oxide (ITO) coated glass substrates (15  $\Omega$  per square) were cleaned via sequential sonication in detergent, de-ionized and ethanol, then blow-dried by high-purity nitrogen. All pre-cleaned ITO substrates were treated by oxygen plasma for 1 minute to improve their work function and clearance. Subsequently, poly(3,4-ethylenedioxythiophene):poly(styrene sulfonate) (PEDOT:PSS, purchased from H.C. Starck co. Ltd.) solution was spin-coated on ITO substrates at 5000 rpm for 40 s and dried at 150 °C for 15 min in atmospheric air. Then ITO substrates coated with PEDOT:PSS films were transferred into a high-purity nitrogen-filled glove box. Polymer donor PM6 and polymer acceptor PY-IT were purchased from Solarmer Materials Inc. The BHJ active layers were spin coated from 14 mg/ml chloroform solution (PM6:PY-IT=1:1, without or with 1 vol% CN) at 2400 rpm for 30 s. For LbL active layer, the donor layers were spin coated from 7 mg/ml PM6 chlorobenzene solution at 800 rpm for 40 s, then the

acceptor layers were spin coated from 7 mg/ml PY-IT chloroform solution (without or with 1 vol% CN) at 1400 rpm for 30 s on the top of the PM6 layers. Then the active layers were thermally annealed at 95 °C for 5 min. PNDIT-F3N was dissolved in methanol with the addition of 0.25 vol% acetic acid to prepare a 0.5 mg/ml solution and then spin coated at 2000 rpm for 30 s on the active layers. Finally, 100 nm Al layer was deposited by thermal evaporation through a shadow mask under the vacuum of  $5 \times 10^{-4}$  Pa conditions. The active area is approximately 3.8 mm<sup>2</sup>, defined by the overlapping area of ITO anode and Al cathode.

**Device Measurement:** The current-voltage ( $J$ - $V$ ) curves of all-PSCs were measured in a high-purity nitrogen-filled glove box using a Keithley 2400 source meter. AM 1.5G irradiation at 100 mW cm<sup>-2</sup> was provided by An XES-40S2 (SAN-EI Electric Co., Ltd.) solar simulator (AAA grade, 70×70 mm<sup>2</sup> photobeam size), which was calibrated by standard silicon solar cells (purchased from Zolix INSTRUMENTS CO. LTD). The absorption spectra of films were obtained by using a Shimadzu UV-3101 PC spectrometer. The external quantum efficiency (EQE) spectra of all-PSCs were measured in the air conditions by a Zolix Solar Cell Scan 100. The reflection spectra measurement of all devices was performed on a commercial QE measurement system (QE-RT3011, Enlitech) by using an integrating sphere. The absorption spectra of active layers in cells were calculated by subtracting the parasitic absorptions ( $1-R_1$ ) from the total absorption ( $1-R_2$ ) in all-PSCs, where  $R_1$  is the reflection spectrum of the special device with configuration of ITO/PEDOT:PSS/PMMA/ PNDIT-F3N/Al,  $R_2$  is the reflection spectra of all-PSCs with configuration of ITO/PEDOT:PSS/Active layers/PNDIT-F3N/Al. The PMMA layer in the special device is used to simulate the optical path in real all-PSCs because PMMA has negligible photon harvesting in the whole spectral range. Photoluminescence (PL) spectra of films were measured by a HORIBA Fluorolog®-3 spectrofluorometer system. Transient photovoltage (TPV) and transient photocurrent (TPC) were conducted with the Parioscarrier measurement system (FLUXiM AG, Switzerland). A high-power white LED is utilized as light source for TPV and TPC measurements. The integrated power of the LED is 72 mW cm<sup>-2</sup>, and the spectrum distribution is mainly in the wavelength range of 440-470 nm and 540-630 nm, and the peak values are located at 460 nm and 550 nm. Grazing incidence wide angle X-ray scattering (GIWAXS) measurements were accomplished at PLS-II 9A U-SAXS beamline of the Pohang Accelerator Laboratory in Korea.

## Additional experimental results

The Mw and Mn of polymer PM6 are 98 and 41 kDa. The Mw and Mn of polymer PY-IT are 15 and 33 kDa.

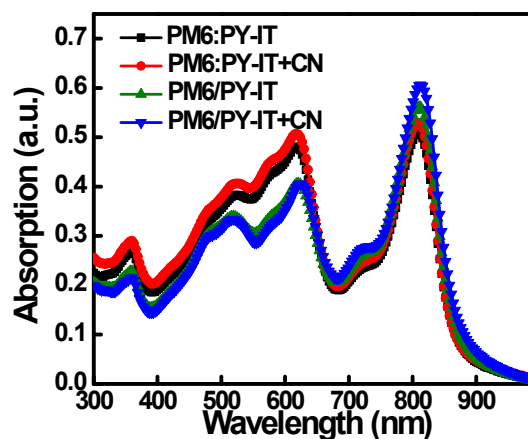

**Figure S1.** Absorption spectra of PM6 and PY-IT blend films processed without or with additive.

**Table S1.** Device parameters of all-PSCs.

| Active layer      | $J_{sat}$<br>(mA cm <sup>-2</sup> ) | $J_{ph}^*$<br>(mA cm <sup>-2</sup> ) | $J_{ph}^{\&}$<br>(mA cm <sup>-2</sup> ) | $\eta_D$<br>(%) | $\eta_C$<br>(%) |
|-------------------|-------------------------------------|--------------------------------------|-----------------------------------------|-----------------|-----------------|
| PM6:PY-IT         | 22.34                               | 20.76                                | 18.08                                   | 92.92           | 80.92           |
| PM6:PY-IT+1% CN   | 23.19                               | 22.29                                | 19.35                                   | 94.61           | 82.01           |
| PM6/ PY-IT        | 22.79                               | 21.12                                | 18.58                                   | 92.66           | 81.51           |
| PM6/ PY-IT +1% CN | 23.72                               | 22.61                                | 19.48                                   | 94.43           | 82.11           |

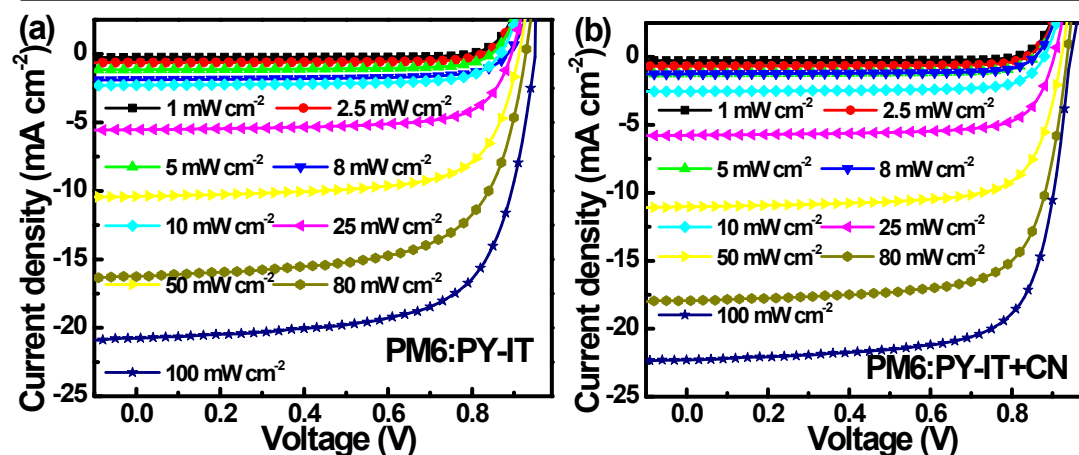

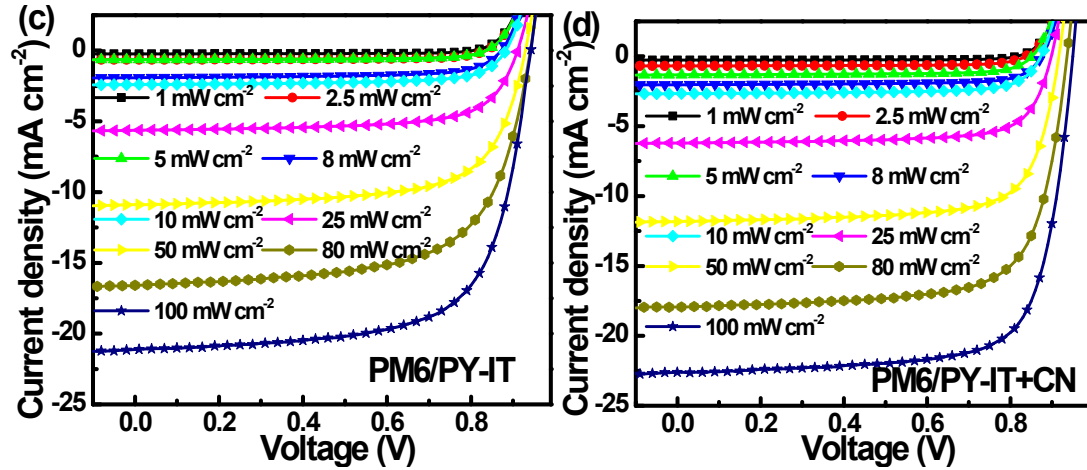

**Figure S2.**  $J$ - $V$  curves of (a) PM6:PY-IT, (b) PM6:PY-IT+CN, (c) PM6/PY-IT, (d) PM6/PY-IT+CN all-PSCs under different light intensity (100, 80, 50, 25, 10, 8, 5, 2.5, 1  $\text{mW cm}^{-2}$ ), obtained from standard AM 1.5G (100  $\text{mW cm}^{-2}$ ) illumination with a set of neutral optical filters.

**Table S2.** The fitted parameters of all-PSCs processed with or without additives.

| Active layer      | $R_{CT}$ ( $\Omega$ ) | $R_{OS}$ ( $\Omega$ ) | $CPE_T$ (nF) | $CPE_P$ | $\tau$ (ns) |
|-------------------|-----------------------|-----------------------|--------------|---------|-------------|
| PM6:PY-IT         | 89.3                  | 33.4                  | 10.8         | 0.873   | 964.44      |
| PM6:PY-IT+1% CN   | 53.0                  | 31.5                  | 17.1         | 0.901   | 906.30      |
| PM6/ PY-IT        | 88.7                  | 32.0                  | 8.7          | 0.886   | 771.69      |
| PM6/ PY-IT +1% CN | 50.1                  | 30.3                  | 15.2         | 0.912   | 761.52      |

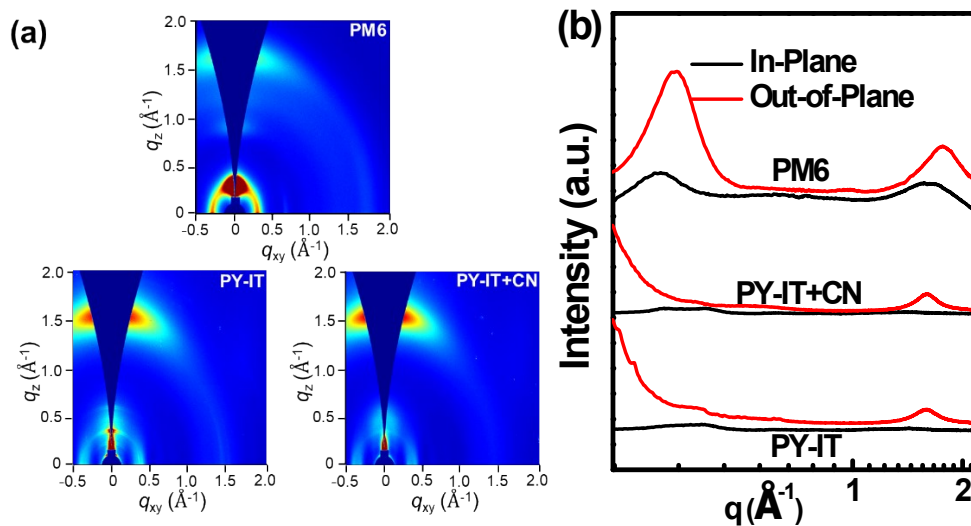

**Figure S3.** (a) The 2D-GIWAXS patterns of PY-IT films and PY-IT films with CN additive. (b) The in-plane (IP, black line) and out-of-plane (OOP, red line) profiles abstracted from 2D-GIWAXS patterns corresponding blend films.
